# Supplementary material
Source: MDPI journal article supplement (https://www.mdpi.com/2813-0227/2/3/14)

**(A)**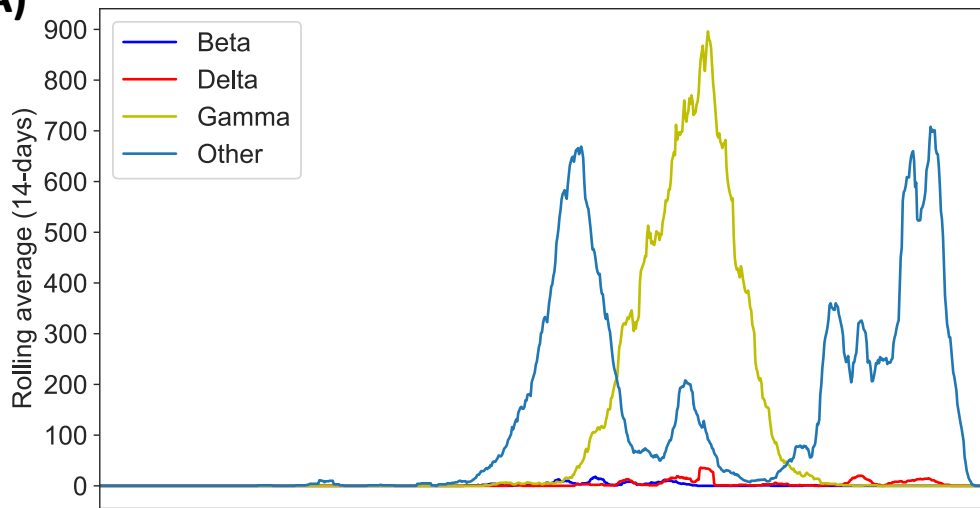**(B)**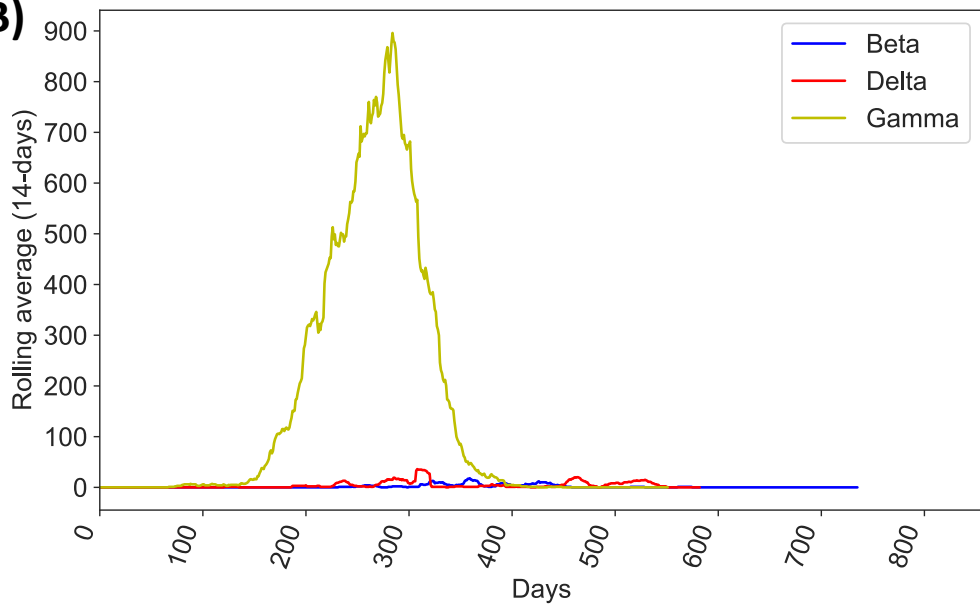

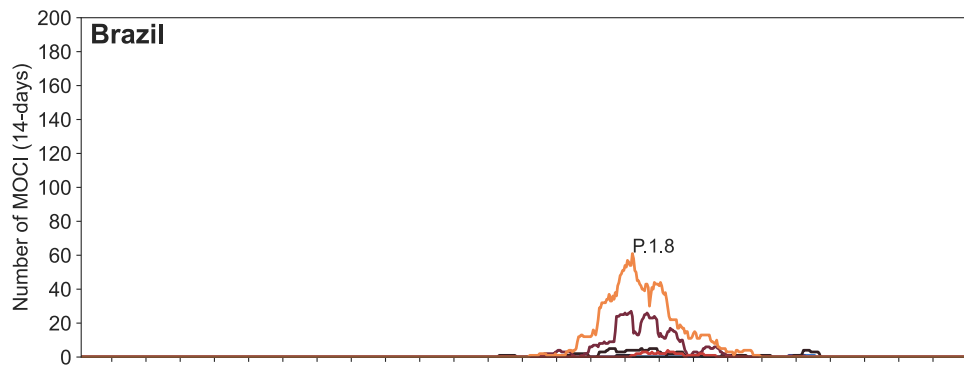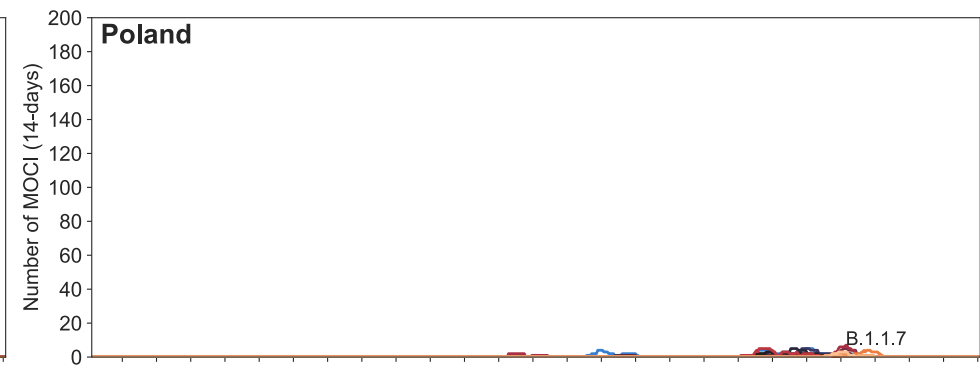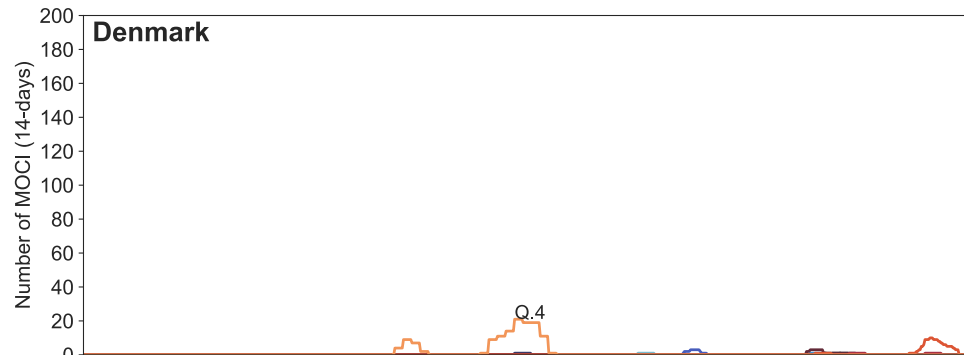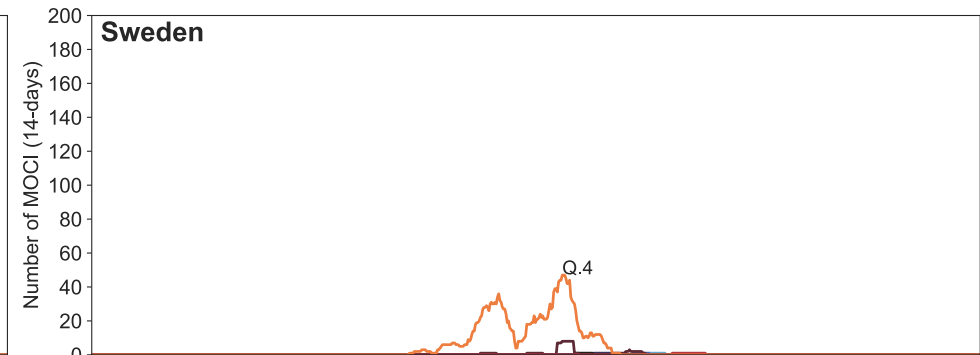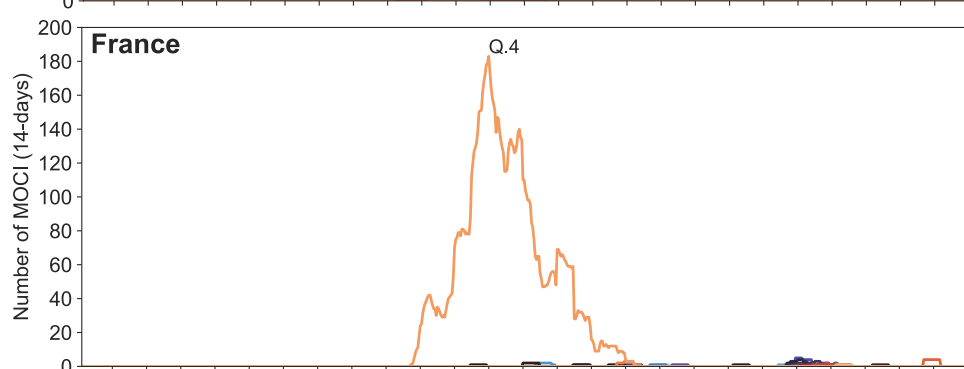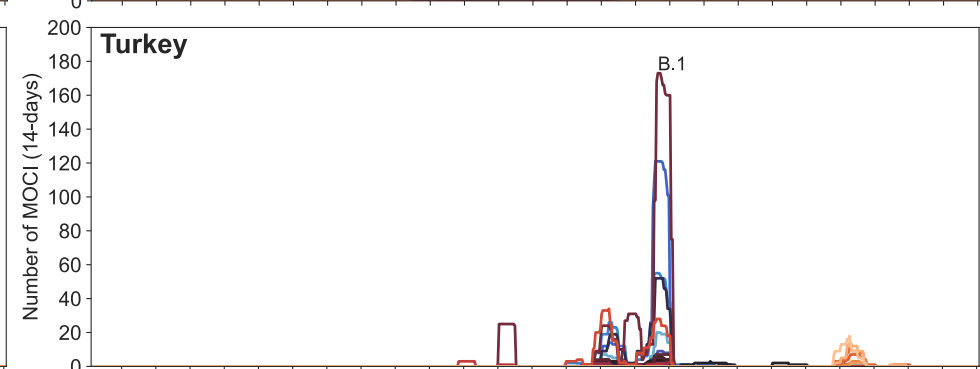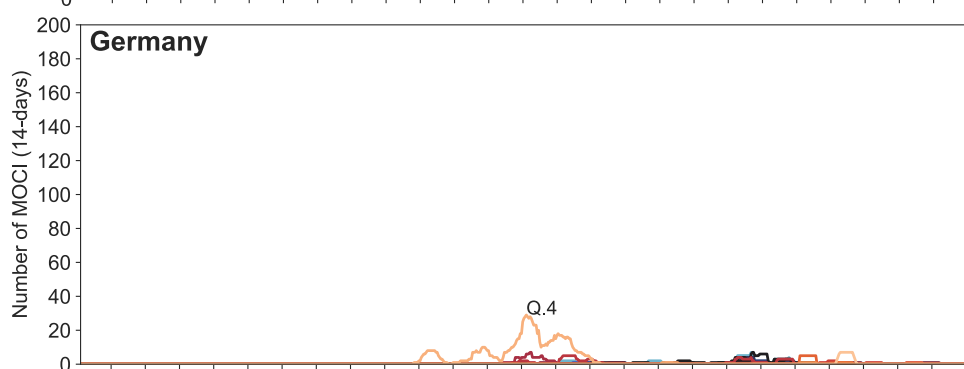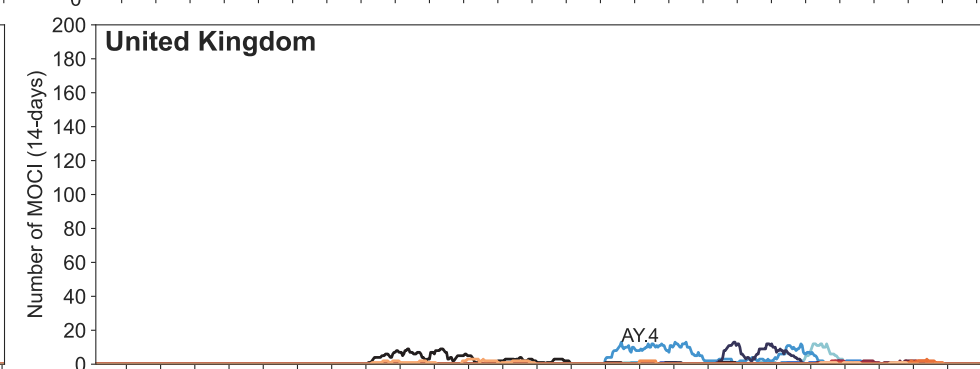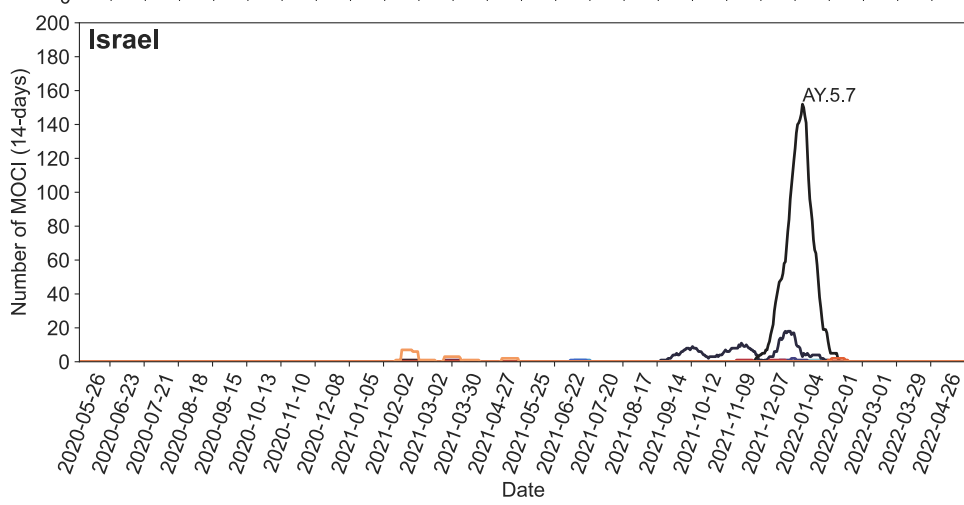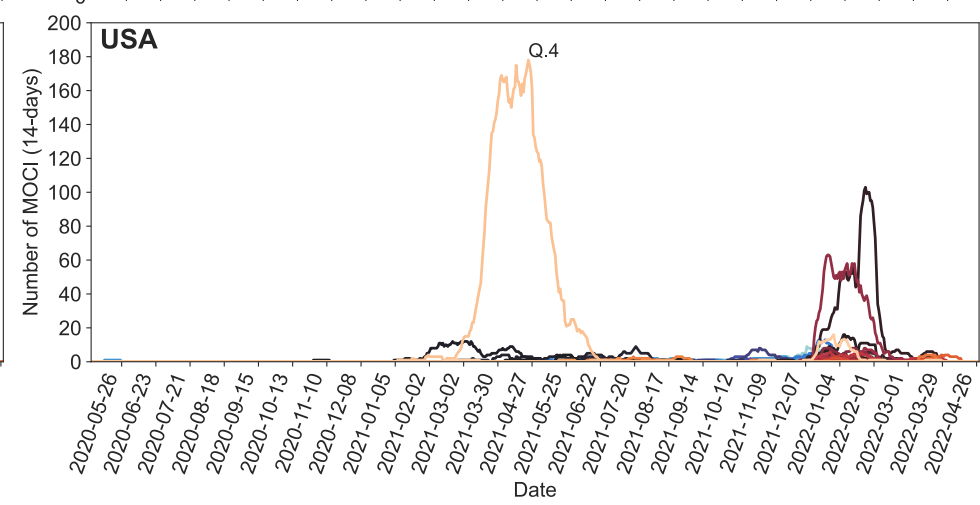

Supplement: s1 [file s1]
